# Supplementary material for: RespiCellTM: An Innovative Dissolution Apparatus for Inhaled Products
Source: MDPI journal article supplement (doi:10.3390/pharmaceutics13101541), 2021-09-23
Supplement: s1 [file s1]

# Supplementary Material: RespiCell™: An Innovative Dissolution Apparatus for Inhaled Products

Fabio Sonvico, Veronica Chierici, Giada Varacca, Eride Quarta, Davide D'Angelo, Ben Forbes and Francesca Buttini

**Table S1.** Active Pharmacological Ingredients Aqueous Solubilities.

| API                 | Solubility in Water |
|---------------------|---------------------|
| NCE-A               | 0.157 µg/mL         |
| NCE-B               | < 0.1 µg/mL         |
| Tobramycin          | 1000 mg/mL          |
| Tiotropium HBr      | 25 mg/mL            |
| Indacaterol Maleate | 0.8 µg/mL           |

## Simulated Lung Fluid (SLF) Preparation

Simulated lung fluid was prepared as described by Marques *et al.* [1]. In particular, as SLF was selected Gamble's solution that represents the interstitial fluid within the lung. When preparing Gamble's solution, the components should be added in the order presented in Table S2 to avoid salt precipitation. Citrate was used instead of proteins to avoid foaming and acetate instead of organic acids. Gamble's solution has a pH of 7.4.

**Table S2.** Simulated Lung Fluid composition.

| Components                                                                                                 | Concentration (g/L) |
|------------------------------------------------------------------------------------------------------------|---------------------|
| Magnesium chloride (MgCl <sub>2</sub> )                                                                    | 0.095               |
| Sodium chloride (NaCl)                                                                                     | 6.019               |
| Potassium chloride (KCl)                                                                                   | 0.298               |
| Disodium hydrogen phosphate (Na <sub>2</sub> HPO <sub>4</sub> )                                            | 0.126               |
| Sodium sulfate (Na <sub>2</sub> SO <sub>4</sub> )                                                          | 0.063               |
| Calcium chloride dihydrate (CaCl <sub>2</sub> ·2H <sub>2</sub> O)                                          | 0.368               |
| Sodium acetate (CH <sub>3</sub> COONa)                                                                     | 0.574               |
| Sodium hydrogen carbonate (NaHCO <sub>3</sub> )                                                            | 2.604               |
| Sodium citrate dihydrate (Na <sub>3</sub> C <sub>6</sub> H <sub>5</sub> O <sub>7</sub> ·2H <sub>2</sub> O) | 0.097               |

## HPLC method details

**Table S3.** Summary of HPLC method details adopted for the API quantification.

| API                 | HPLC Column                                            | UV Wave-length (nm) | Mobile Phase                                                                                                                                 | Flow rate (ml/min) | Injection volume (μl) | Column temperature (°C) |
|---------------------|--------------------------------------------------------|---------------------|----------------------------------------------------------------------------------------------------------------------------------------------|--------------------|-----------------------|-------------------------|
| NCE-A               | Atlantis dC18, 3.9x150 mm, 3.0 μm (Waters Corporation) | 228                 | Gradient elution (Table S4). 0.02 M of NaH <sub>2</sub> PO <sub>4</sub> , (pH of 3.0 with H <sub>3</sub> PO <sub>4</sub> ) and acetonitrile. | 1                  | 50                    | 40                      |
| NCE-B               | Atlantis dC18, 3.9x150 mm, 3.0 μm (Waters Corporation) | 225                 | Gradient elution (Table S5). 0.02 M of NaH <sub>2</sub> PO <sub>4</sub> , (pH of 3.0 with H <sub>3</sub> PO <sub>4</sub> ) and acetonitrile  | 1                  | 50                    | 40                      |
| Tobramycin          | μBondapak® C18 3.9x300 mm, 10 μm (Waters Corporation)  | 360                 | Isocratic elution Tris (Hidroxyethyl) amino-methane, Sulfuric acid 1N and acetonitrile                                                       | 1.2                | 20                    | 25                      |
| Tiotropium Bromide  | XB-C8 4.6x100 mm, 5 μm (Phenomenex®)                   | 237                 | Isocratic elution Sodium Octane Sulfonate (pH of 3.2 with H <sub>3</sub> PO <sub>4</sub> ) and acetonitrile                                  | 1                  | 100                   | 30                      |
| Indacaterol Maleate | Purospher® STAR RP-18 endcapped 5μm, 4 x 125 mm (Merk) | 250                 | Isocratic elution KH <sub>2</sub> PO <sub>4</sub> (pH of 4 with H <sub>3</sub> PO <sub>4</sub> ) and acetonitrile                            | 0.8                | 100                   | 35                      |

**Table S4.** Elution gradient of NCE-A.

| Time (minutes) | NaH <sub>2</sub> PO <sub>4</sub> (%) | Acetonitrile (%) |
|----------------|--------------------------------------|------------------|
| 0              | 40                                   | 60               |
| 2              | 20                                   | 80               |
| 5              | 40                                   | 60               |
| 6              | 40                                   | 60               |

**Table S5.** Elution gradient of NCE-B.

| Time (minutes) | NaH <sub>2</sub> PO <sub>4</sub> (%) | Acetonitrile (%) |
|----------------|--------------------------------------|------------------|
| 0              | 65                                   | 35               |
| 7              | 65                                   | 35               |
| 7.5            | 30                                   | 70               |
| 9.5            | 30                                   | 70               |
| 10             | 65                                   | 35               |
| 12             | 65                                   | 35               |

## References

1. Marques MRC, Loebenberg R, Almukainzi M. Simulated Biological Fluids with Possible Application in Dissolution Testing. Dissolut Technol. 2011;18:15–28.
